# Supplementary material for: Both landscape heterogeneity and configuration determine Woodlarks (Lullula arborea) breeding territories
Source: PeerJ. 2021 Nov 19;9:e12476. doi: 10.7717/peerj.12476 (PMC8607927; doi:10.7717/peerj.12476)
Supplement: Supplemental Information 2 [file peerj-09-12476-s002.xlsx]

## Sheet: Abbreviations
Abreviation	Variable
Region	Neumarkt (NM) or the Nature Park (NP)
ID	ID of each sampling point
A_P	Pseudo-absence_ Presence
PD	Patch density
LSI	Landscape shape index
PROX_MN	Proximity index
CONTAG	Contagion index
SIDI	Simpson diversity index
PLAND_grassland	Grassland cover
PLAND_soil_A	Bare soil cover
PLAND_small_veg_A	Short cropland cover
PLAND_mid_high_veg_A	Tall cropland cover
PLAND_forest	Forest cover
PLAND_dirt_rd	Dirt road cover
PLAND_asphalt_str	Asphalt road cover
PLAND_grove	Grove cover
PLAND_rough_pasture	Rough pasture cover
PLAND_residental	Residential area cover
PLAND_water	Water cover
PD_grassland	Patch density of grassland
PD_soil_A	Patch density of bare soil
PD_small_veg_A	Patch density of short cropland
PD_mid_high_veg_A	Patch density of tall cropland
PD_forest	Patch density of forest
PD_dirt_rd	Patch density of dirt road
PD_asphalt_str	Patch density of asphalt road
PD_grove	Patch density of grove
PD_rough_pasture	Patch density of rough pasture
PD_residencial	Patch density of residential area
PD_water	Patch density of water
LSI_grassland	Landscape shape index of grassland
LSI_soil_A	Landscape shape index of bare soil
LSI_small_veg_A	Landscape shape index of short cropland
LSI_mid_high_veg_A	Landscape shape index of tall cropland
LSI_forest	Landscape shape index of forest
LSI_dirt_rd	Landscape shape index of dirt road
LSI_asphalt_str	Landscape shape index of asphalt road
LSI_grove	Landscape shape index of grove
LSI_rough_pasture	Landscape shape index of rough pasture
LSI_residencial	Landscape shape index of residential area
LSI_water	Landscape shape index of water
MH_grassland	Mean height grassland
MH_small_veg_A	Mean height short cropland
MH_mid_high_veg_A	Mean height tall cropland
MH_forest	Mean height forest
MH_dirt_rd	Mean height vegetation track lanes dirt road
MH_grove	Mean height grove
MH_rough_pasture	Mean height rough pasture
Mdbh_forest	Mean DBH forest
Mdbh_grove	Mean DBH grove
dis_hedgerow	Distance to hedgerow
dis_forest	Distance to forest
dis_dirt_rd	Distance to dirt road
dis_el_line	Distance to electricity line
dis_grove	Distance to groves
len_dirt_rd	Length dirt road
len_hedgerow	Length hedgerow
len_el_line	Length electricity line
len_asphalt_str	Length asphalt road

## Sheet: data
Region	ID	A_P	PD	LSI	PROX_MN	CONTAG	SIDI	PLAND_grassland	PLAND_soil_A	PLAND_small_veg_A	PLAND_mid_high_veg_A	PLAND_forest	PLAND_dirt_rd	PLAND_asphalt_str	PLAND_grove	PLAND_rough_pasture	PLAND_residental	PLAND_water	PD_grassland	PD_soil_A	PD_small_veg_A	PD_mid_high_veg_A	PD_forest	PD_dirt_rd	PD_asphalt_str	PD_grove	PD_rough_pasture	PD_residencial	PD_water	LSI_grassland	LSI_soil_A	LSI_small_veg_A	LSI_mid_high_veg_A	LSI_forest	LSI_dirt_rd	LSI_asphalt_str	LSI_grove	LSI_rough_pasture	LSI_residencial	LSI_water	MH_grassland	MH_small_veg_A	MH_mid_high_veg_A	MH_forest	MH_dirt_rd	MH_grove	MH_rough_pasture	Mdbh_forest	Mdbh_grove
NM	13	0	269.213	4.1175	216.182	64.3202	0.666	18.852	0	0	50.0482	21.3585	1.6649	2.2926	2.175	0.2976	3.3113	0	70.8456	0	0	56.6765	28.3382	42.5074	14.1691	28.3382	14.1691	14.1691	0	3.6667	0	0	2.8085	2.5691	6.3623	5.2963	1.7848	2.8621	1.5876	0	47.5	0	45.65	2075	18	1500	27.5	33.9796	38.3033
NM	14	0	127.556	2.938	82.8334	73.2544	0.4735	16.5568	0	0	7.6449	70.1277	0.4932	3.5617	0.9312	0.6846	0	0	28.3459	0	0	14.1729	28.3459	14.1729	14.1729	14.1729	14.1729	0	0	2.5484	0	0	1.6463	1.964	2.6053	4.0396	2.8846	4.5455	0	0	28.125	0	27.5	2518.33	NA	1037.5	25	42.0593	21.8042
NM	15	0	311.729	3.7284	115.924	61.6893	0.7023	26.9348	44.7304	0	2.8835	14.4317	1.8449	2.457	2.2204	0	4.4974	0	42.5086	42.5086	0	14.1695	14.1695	28.339	14.1695	141.695	0	14.1695	0	2.779	2.2331	0	1.4505	2.2327	4.9452	4.2262	4.2125	0	1.4956	0	24.7222	0	45	2025	9	645	0	38.5155	55.7042
NM	16	0	269.24	3.5348	508.872	66.1018	0.6683	3.9507	0	49.3574	24.943	15.3127	1.1251	1.4043	1.5219	0.5994	1.7855	0	28.3411	0	28.3411	28.3411	14.1705	28.3411	14.1705	70.8526	14.1705	42.5116	0	2.3679	0	2.0856	2.2331	1.8846	4.9123	4.3333	3.2424	5.5	2.0563	0	8.5	10.875	61.25	2125	11.5	708.333	37.5	39.7887	38.5862
NM	17	0	56.6845	1.5442	0	88.8079	0.1261	0	0	4.821	1.4596	93.3467	0	0	0	0.3727	0	0	0	0	14.1711	14.1711	14.1711	0	0	0	14.1711	0	0	0	0	1.641	1.8769	1.1868	0	0	0	3.6061	0	0	0	15	9	2233.33	0	0	NA	34.7311	0
NM	18	0	85.0292	2.6316	527.683	61.2556	0.6609	0	0	44.8685	29.1551	22.8686	1.7247	0	1.3831	0	0	0	0	0	28.3431	14.1715	14.1715	14.1715	0	14.1715	0	0	0	0	0	2.3427	1.2683	1.502	6.0286	0	3.127	0	0	0	0	6.16667	153.167	2333.33	NA	666.667	0	42.6535	15.1197
NM	19	0	170.042	4.2735	39.8661	62.2881	0.5642	22.9244	0	0	0	61.1271	0	6.7691	6.643	0	0	2.5365	56.6805	0	0	0	28.3403	0	14.1701	42.5104	0	0	28.3403	3.7333	0	0	0	2.1418	0	3.9065	7.7445	0	0	5.8824	25.0833	0	0	1891.67	0	1717.86	0	27.5935	29.0799
NM	20	0	70.8255	1.8872	2148.36	71.5679	0.3684	0	0	0	22.9999	76.068	0.9321	0	0	0	0	0	0	0	0	28.3302	28.3302	14.1651	0	0	0	0	0	0	0	0	1.6	1.7478	3.6346	0	0	0	0	0	0	0	37.5	2035.71	7	0	0	24.6235	0
NM	21	0	170.032	3.1682	8.4838	72.5902	0.4552	68.8657	0	0	0	26.362	1.3192	0	2.8282	0.6249	0	0	14.1693	0	0	0	42.508	14.1693	0	70.8466	28.3386	0	0	2.8798	0	0	0	2.3846	4.9194	0	4.5111	3.3095	0	0	18.2321	0	0	2311.11	4	857.619	9	34.9787	31.0845
NM	22	0	439.38	5.4398	183.179	58.7426	0.5225	9.0356	0	0	0	0	0	19.8345	5.8182	0	65.3117	0	42.5206	0	0	0	0	0	42.5206	212.603	0	141.735	0	3.0625	0	0	0	0	0	7.1899	4.7209	0	5.5465	0	NA	0	0	0	0	NA	0	0	NA
NM	23	0	85.0208	1.7077	0.0215	84.3358	0.2066	2.9162	3.2308	0	4.8788	88.8311	0.1431	0	0	0	0	0	14.1701	14.1701	0	28.3403	14.1701	14.1701	0	0	0	0	0	1.3626	1.2917	0	1.8475	1.4291	1.6667	0	0	0	0	0	20	0	NA	2305.56	NA	0	0	36.2166	0
NM	26	0	127.524	2.4295	266.868	79.7873	0.2671	13.0783	0	0	0	84.588	0	0	1.3928	0	0	0.9408	28.3386	0	0	0	28.3386	0	0	56.6773	0	0	14.1693	3.5233	0	0	0	1.6585	0	0	3.0159	0	0	5.8462	21	0	0	2193.75	0	775	0	27.5139	31.1944
NM	27	0	85.0147	2.188	44.858	81.7414	0.2421	12.1925	0	0	0	86.1894	0.5724	0	0	1.0457	0	0	28.3382	0	0	0	14.1691	14.1691	0	0	28.3382	0	0	2.172	0	0	0	1.834	4.5854	0	0	4.1818	0	0	18.75	0	0	2400	5	0	6.75	33.4402	0
NP	32	0	311.721	4.203	57.1111	65.7595	0.6245	41.5595	0	0	44.4514	5.0541	0	2.182	4.136	0.7623	1.8547	0	42.5074	0	0	28.3382	28.3382	0	14.1691	155.86	14.1691	28.3382	0	4.3673	0	0	2.4789	2.2083	0	4.7468	4.055	4.6809	2.6301	0	13.25	0	10.85	1875	0	691.082	0	21.844	30.7974
NP	33	0	439.249	5.1805	166.378	57.0778	0.7999	26.1651	25.5586	8.4591	0	22.6157	1.2653	1.7754	2.0163	0.4662	7.0011	4.6773	113.355	28.3386	14.1693	0	56.6773	28.3386	14.1693	99.1853	28.3386	42.508	14.1693	5.5551	2.5725	1.5806	0	3.0119	5.8	5.5493	3.5526	3.3784	2.766	1.5217	23.7778	8.5	0	1225	14.5	548.75	21	34.2714	29.6479
NP	34	0	212.736	3.6729	255.254	61.7291	0.7086	39.8426	0	6.3906	25.2829	25.3539	0.8963	1.5232	0	0.7105	0	0	70.9119	0	14.1824	42.5472	28.3648	14.1824	14.1824	0	28.3648	0	0	3.2976	0	1.9333	2.6269	1.8657	4.451	5.5758	0	3.1111	0	0	17.9444	7.5	20.25	1450	NA	0	11.75	29.311	0
NM	1	1	226.719	3.9586	63.6291	59.1528	0.7758	34.7163	0	11.3274	21.5029	18.846	1.1478	2.0164	0.3968	0.87	9.1764	0	70.8496	0	14.1699	14.1699	42.5098	14.1699	14.1699	14.1699	14.1699	28.3399	0	3.8758	0	1.8045	1.5789	2.5974	4.2281	3.8026	1.7059	3.94	1.8447	0	39.5833	14.5	32.5	1533.33	21	700	12.5	22.6531	NA
NM	2	1	170.054	3.062	81.6886	57.7329	0.7625	15.7158	10.3676	16.7956	19.7205	36.7273	0.2948	0	0	0	0	0.3784	28.3423	14.1711	28.3423	28.3423	42.5134	14.1711	0	0	0	0	14.1711	2.1659	1.4302	1.9817	2.0254	2.9006	2.4483	0	0	0	0	1.2121	19.25	10.75	23	2062.5	NA	0	0	27.1094	0
NM	3	1	227.334	3.8051	166.429	61.5706	0.7152	42.996	21.4561	22.0812	0	5.0255	1.7306	4.4074	1.9863	0.3168	0	0	71.0419	28.4168	14.2084	0	14.2084	14.2084	14.2084	56.8335	14.2084	0	0	3.5862	2	1.64	0	1.5294	4.6857	3.7411	3.6267	3	0	0	20	7	0	1200	7	810	13.25	25.78	26.9847
NM	4	1	127.83	2.8616	125.743	58.5572	0.6922	31.6337	29.4535	0	0	34.6448	0	1.7584	0	0	2.5097	0	42.61	14.2033	0	0	42.61	0	14.2033	0	0	14.2033	0	2.8562	1.3564	0	0	2.3674	0	4.3239	0	0	1.7059	0	21.5625	0	0	2330.56	0	0	0	42.0346	0
NM	5	1	297.868	4.4596	115.7	59.5509	0.7557	14.7374	0	33.9683	30.5372	10.824	1.5177	3.0496	1.783	2.5617	0	1.0213	56.7368	0	28.3684	28.3684	42.5526	28.3684	28.3684	28.3684	42.5526	0	14.1842	2.9314	0	2.7355	2.0544	2.0686	3.9848	7.0323	2.7465	6.3412	0	1.5185	23	19	42.75	1725	6.25	766.667	17.8333	28.3296	26.8972
NM	6	1	283.387	3.8261	138.729	59.6317	0.7903	19.9447	13.5813	29.8704	5.4977	24.0283	1.0882	0.7977	1.6904	0.2635	3.2377	0	70.8466	14.1693	14.1693	28.3386	42.508	14.1693	14.1693	42.508	14.1693	28.3386	0	3.6429	1.3265	1.6357	1.856	2.7011	5.9286	3.625	2.6286	2.75	1.7083	0	14	14.3333	22.25	1850	NA	2500	9	26.0484	49.0197
NM	7	1	240.889	4.1664	32.6717	54.1863	0.8151	16.1891	19.4851	25.4818	15.2624	17.4928	4.0597	0	0.7779	0	0	1.2512	42.5098	14.1699	28.3399	28.3399	56.6797	14.1699	0	42.5098	0	0	14.1699	3.6682	1.6128	1.9888	2.0529	2.704	8.1111	0	2.8723	0	0	1.55	13	12.25	33	1375	7.5	793.333	0	34.5366	37.1043
NM	8	1	184.227	3.1823	48.0475	65.5639	0.6822	5.677	45.5764	0	31.0721	8.5481	2.2873	0.0907	1.0869	0.9141	4.7474	0	14.1713	28.3427	0	28.3427	14.1713	14.1713	14.1713	42.514	14.1713	14.1713	0	1.2283	2.0167	0	2.0135	1.8077	5.7901	1.25	2.3929	4.451	1.5172	0	NA	0	53.75	2050	5	706.67	20	33.9	44.03
NM	9	1	340.054	3.9887	101.348	56.8914	0.7482	36.8449	0	0	20.8836	24.7234	1.6634	2.328	4.2436	0	9.3132	0	85.0135	0	0	28.3378	14.1689	56.6757	14.1689	99.1825	0	42.5068	0	3.774	0	0	2.3704	1.6151	4.7246	4.9268	3.2364	0	2.0552	0	26	0	35.625	1779.17	10	873.889	0	22.9448	42.375
NM	10	1	212.576	4.031	21.2466	62.4009	0.7293	6.6154	0	15.4075	34.4557	34.8483	1.6425	2.6459	3.747	0.2891	0	0.3486	56.6869	0	14.1717	28.3435	14.1717	14.1717	28.3435	28.3435	14.1717	0	14.1717	4.6934	0	1.4737	1.7949	3.2261	4.7536	3.7816	3.5146	2.6897	0	2.125	11.1667	20.75	5.04167	1662.5	5.5	NA	20	28.2102	NA
NM	11	1	198.365	3.3318	91.333	68.0965	0.5862	1.7626	27.4665	0	57.3827	9.0029	1.271	2.0502	1.0641	0	0	0	28.3378	42.5068	0	42.5068	28.3378	28.3378	14.1689	14.1689	0	0	0	3.4507	2.2545	0	2.2655	1.9438	6.5667	4.1039	2.4909	0	0	0	NA	0	NA	NA	NA	NA	0	NA	NA
NM	12	1	226.719	3.2039	103.972	63.235	0.746	26.5332	0.6447	31.4813	8.8307	27.5393	2.4939	0	0.8856	0.9466	0.6447	0	42.5098	14.1699	14.1699	14.1699	14.1699	14.1699	0	70.8496	28.3399	14.1699	0	2.3285	2.9767	1.291	1.4051	1.4839	6.9405	0	3.04	4.2308	1.5349	0	24.375	11.8333	39	2266.67	NA	848.333	14.5	40.7437	46.8022
NM	24	1	524.436	5.6269	98.0054	57.7645	0.7611	28.929	4.299	0	20.2957	32.8878	2.5952	0	4.1119	3.002	2.3926	1.4868	113.391	14.1739	0	56.6958	56.6958	42.5218	0	141.739	70.8697	14.1739	14.1739	5.6259	1.4054	0	3.25	2.918	7.3488	0	4.037	7.0323	1.6506	1.4154	19.6429	0	28	1725	4	1002.38	10	27.8123	29.8097
NM	25	1	354.253	4.2726	61.5905	59.2516	0.7105	19.4527	0	17.1416	13.0804	45.1928	1.7344	0	2.3565	1.0415	0	0	85.0208	0	28.3403	56.6805	28.3403	28.3403	0	99.1909	28.3403	0	0	4.566	0	2.4455	3.7047	1.8324	6.4	0	3.5	4.1636	0	0	22	10.5	32.5	2430	NA	653.333	12.5	34.3456	26.0484
NP	28	1	297.556	4.4878	365.192	61.4523	0.6982	46.2572	0	0	19.3794	21.5671	2.2317	1.6252	1.5331	3.6883	3.718	0	85.0159	0	0	42.508	28.3386	42.508	14.1693	28.3386	42.508	14.1693	0	3.6492	0	0	2.1068	2.332	7.3625	5.6618	2.4545	4.8835	1.4175	0	27.0714	0	31.375	1087.5	17.5	481.25	26.875	38.6747	23.0775
NP	29	1	255.08	3.3036	141.148	70.4983	0.5756	20.7054	0	0	60.7871	10.2486	1.0472	2.0052	2.0548	0.7539	2.1838	0.214	70.8557	0	0	28.3423	14.1711	28.3423	14.1711	42.5134	28.3423	14.1711	14.1711	2.6364	0	0	2.188	1.6199	3.9455	5.5526	2.4675	2.2979	1.1772	2.48	25.5625	0	21.5833	1362.5	6	672.222	19	38.1972	42.5297
NP	30	1	269.217	4.11	83.7711	66.8789	0.6305	42.6185	0.571	0	10.2572	41.988	1.6125	0	2.7375	0.2154	0	0	28.3386	14.1693	0	28.3386	56.6773	14.1693	0	99.1853	28.3386	0	0	4.121	1.2927	0	2.1988	2.9362	5.2353	0	4.7386	5.12	0	0	22	0	31	1941.67	4.5	525	14.75	33.3164	NA
NP	31	1	453.425	5.4088	158.418	59.6892	0.7376	44.5731	5.2371	17.4399	0.656	14.5776	2.4202	2.8084	3.395	0	8.2027	0.6901	99.1867	28.339	14.1695	14.1695	56.6781	42.5086	14.1695	141.695	0	28.339	14.1695	5.5887	2.3279	1.4865	1.9545	2.8621	7.1807	5.5889	4.0918	0	2.0458	1.7111	22.2222	7.75	NA	1766.67	7.5	657	0	34.8549	50.4786
[truncated: 9 more columns]
